# Supplementary material for: Bifidobacterium longum CCFM1077 Ameliorated Neurotransmitter Disorder and Neuroinflammation Closely Linked to Regulation in the Kynurenine Pathway of Autistic-like Rats
Source: Nutrients. 2022 Apr 13;14(8):1615. doi: 10.3390/nu14081615 (PMC9031594; doi:10.3390/nu14081615)
Supplement: Supplementary file 1 [file nutrients-14-01615-s001.zip › Table S2 Correlation coefficient.xlsx]

## Sheet: Sheet1
Data1	Data2	rho	pvalue	relation
Brain-DIO	Brain-QA	0.927273	0	positive
Cecum-DIO	Cecum-KYN	0.9	0.00202822	positive
B.longum	Cecum-KYN	0.857143	0.0107143	positive
Brain-QA	Cere-Glu/GABA	0.854545	0.00164924	positive
B. pseudocatenulatum	PFC-Glu/GABA	0.85	0.00607363	positive
FST	MB	0.83891	0.00241399	positive
YMT	Serum-KYNA	0.826752	0.00317971	positive
g__Ruminococcaceae NK4A214 group	g__Ruminococcaceae UCG-010	0.806596	9.16384e-05	positive
Cecum-DIO	Cere-Glu/GABA	0.806061	0.00823557	positive
L. taiwanensis	Serum-KYN	0.785714	0.0279266	positive
Brain-QA	FST	0.783333	0.0172233	positive
Brain-QA	Cecum-DIO	0.781818	0.0116513	positive
Cecum-KAT	PFC-NE	0.781818	0.0116513	positive
Brain-QA	PFC-Glu/GABA	0.772727	0.00806166	positive
Cecum-KAT	YMT	0.765961	0.00978704	positive
Brain-DIO	Cere-Glu/GABA	0.763636	0.00921599	positive
Brain-QA	Cecum-KYN	0.733333	0.0311232	positive
Cere-Glu/GABA	FST	0.733333	0.0311232	positive
Cecum-KAT	Cecum-KYNA	0.729487	0.0166469	positive
Cere-Glu/GABA	MB	0.728931	0.0109304	positive
Cecum-KYN	MB	0.711303	0.0316566	positive
Cere-Glu/GABA	PFC-Glu/GABA	0.709091	0.0187284	positive
Brain-KYN	Cere-Glu/GABA	0.7	0.0208124	positive
Cecum-KAT	Serum-KYNA	0.69697	0.0311411	positive
Brain-QA	MB	0.683373	0.0204399	positive
Brain-KYN	MB	0.678817	0.0216366	positive
YMT	Serum-KAT	0.669462	0.0485682	positive
Brain-DIO	MB	0.66515	0.0255252	positive
Cecum-DIO	MB	0.662617	0.0368064	positive
Cecum-DIO	PFC-Glu/GABA	0.660606	0.0440266	positive
Brain-KYN	Cecum-DIO	0.648485	0.0490426	positive
Cecum-KYNA	YMT	0.643293	0.0447888	positive
L. johnsonii	L. taiwanensis	0.607143	0.0186903	positive
Cecum-KAT	FST	-0.9	0.00202822	negtive
Cere-Glu/GABA	YMT	-0.888385	0.000257796	negtive
Brain-QA	Cecum-KYNA	-0.881463	0.000746861	negtive
B. pseudocatenulatum	Cecum-KYNA	-0.870301	0.00227378	negtive
MB	YMT	-0.859155	0.000342917	negtive
Cecum-DIO	Serum-KYNA	-0.854545	0.00350474	negtive
Brain-QA	Cecum-KAT	-0.854545	0.00350474	negtive
Cere-Glu/GABA	Serum-KAT	-0.85	0.00607363	negtive
FST	YMT	-0.829284	0.00300759	negtive
Brain-QA	YMT	-0.815492	0.00221629	negtive
Cecum-KYNA	Cere-Glu/GABA	-0.808514	0.00463528	negtive
Cecum-KYNA	PFC-Glu/GABA	-0.808514	0.00463528	negtive
Cecum-DIO	YMT	-0.808514	0.00463528	negtive
Cere-Glu/GABA	Serum-KYNA	-0.806061	0.00823557	negtive
Serum-KAT	Serum-KYN	-0.785714	0.0279266	negtive
L. johnsonii	L. reuteri	-0.785714	0.000820674	negtive
PFC-Glu/GABA	Serum-KAT	-0.783333	0.0172233	negtive
Cecum-KAT	Cere-Glu/GABA	-0.781818	0.0116513	negtive
Cecum-KYN	YMT	-0.769881	0.0152402	negtive
Brain-DIO	Cecum-KAT	-0.769697	0.0136718	negtive
L. reuteri	L. taiwanensis	-0.764286	0.00139293	negtive
Brain-DIO	PFC-NE	-0.763636	0.00921599	negtive
Cecum-KYN	L. murinus	-0.761905	0.036756	negtive
Cecum-DIO	Cecum-KAT	-0.757576	0.0159208	negtive
Brain-DIO	YMT	-0.747155	0.00822565	negtive
Brain-KYN	Serum-KYNA	-0.745455	0.0184138	negtive
Brain-DIO	Cecum-KYNA	-0.735566	0.0153235	negtive
Cecum-KYN	Serum-KYNA	-0.733333	0.0311232	negtive
Cecum-DIO	Cecum-KYNA	-0.686933	0.0282056	negtive
Cecum-KAT	MB	-0.674775	0.0323118	negtive
Brain-QA	Serum-KYNA	-0.660606	0.0440266	negtive
MB	Serum-KYNA	-0.656538	0.0392044	negtive
Brain-KYN	YMT	-0.656038	0.0283769	negtive
Brain-QA	PFC-NE	-0.636364	0.0403864	negtive
L. johnsonii	L. murinus	-0.621429	0.0155718	negtive
